# Supplementary material
Source: MDPI journal article supplement (https://www.mdpi.com/2311-5637/8/12/726)
Supplement: s1 [file s1]

**Table S1. Characteristics of the *Lpc*. UNQLpc10 genome.**

|                                                                        |           |
|------------------------------------------------------------------------|-----------|
| Genome size, bp                                                        | 3,052,122 |
| Overall G+C content, %                                                 | 46.3      |
| Number of genes                                                        | 3185      |
| Number of coding genes                                                 | 2933      |
| Number of CDS (total)                                                  | 3106      |
| Number of rrnoperons                                                   | 79        |
| ncRNAs                                                                 | 4         |
| CRISPR array                                                           | 1         |
| Transposons                                                            | 38        |
| Tandem repeats                                                         | 80        |
| ribosomal RNA operons                                                  | 5         |
| Pseudogenes (total)                                                    | 173       |
| Pseudogenes (ambiguous residues)                                       | 0 of 173  |
| Pseudogenes (frameshifted)                                             | 92 of 173 |
| Pseudogenes (incomplete)                                               | 80 of 173 |
| Pseudogenes (internal stop)                                            | 23 of 173 |
| Pseudogenes (multiple problems)                                        | 21 of 173 |
| CRISPR: clustered regularly interspaced short palindromic repeat locus |           |

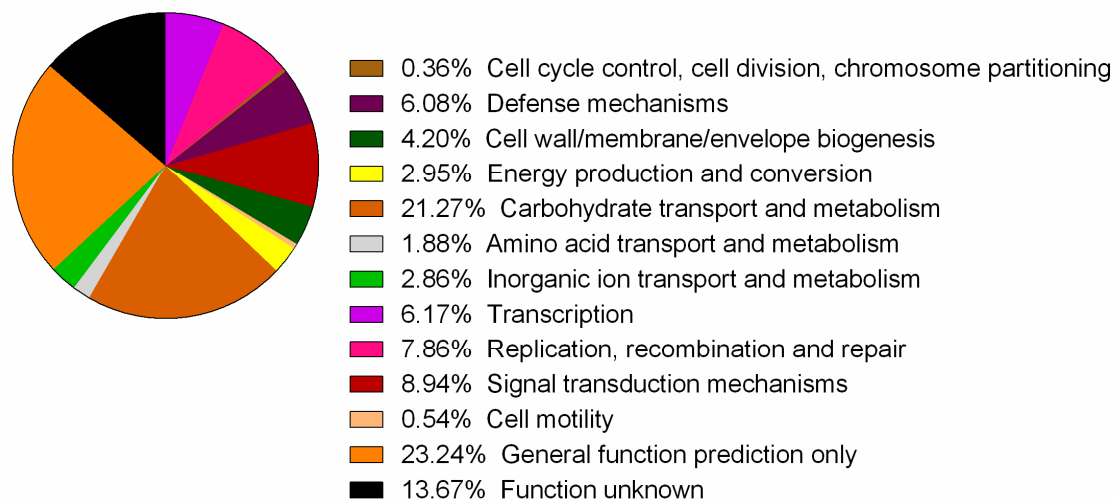

**Figure S1.** Analysis of the COG database performed on the 89 unique genes found in the *Lcb. paracasei* UNQLpc 10 genome.

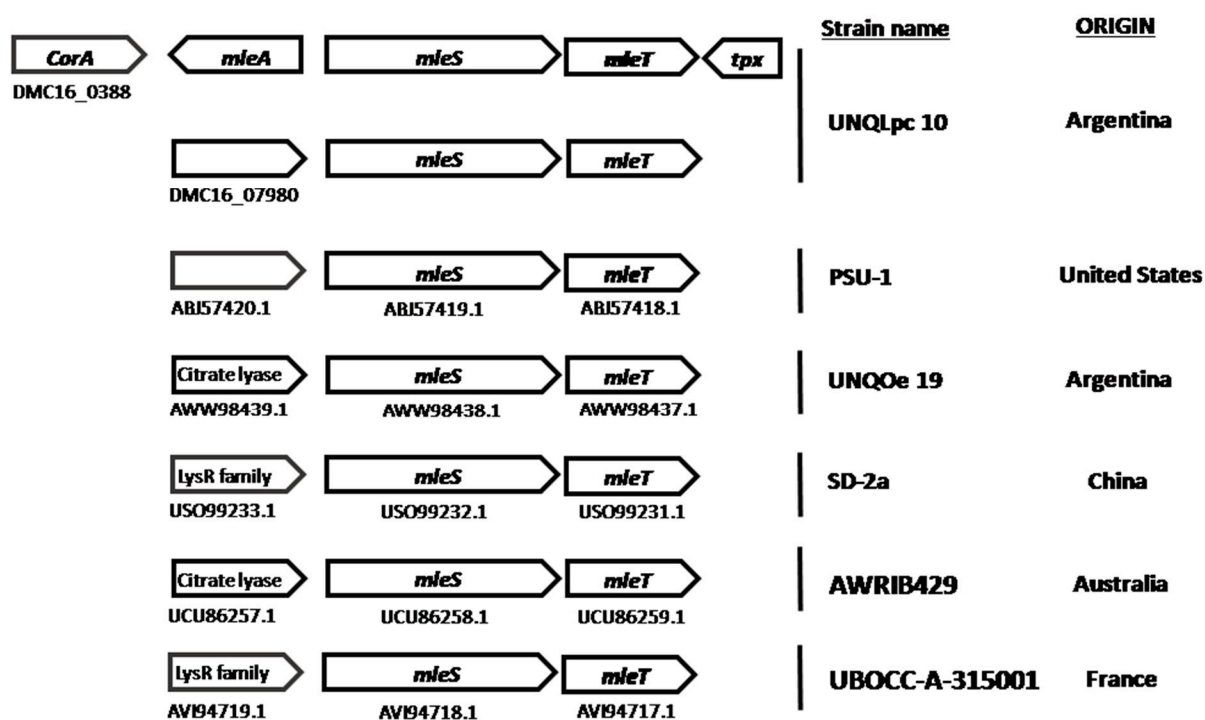

**Figure S2.** Schematic representation of the *mle* gene clusters in *Lcb. paracasei* UNQLpc 10 and *O. oeni* strains from different origin.
